# Supplementary material for: Physicochemical Stability of a Novel Tacrolimus Ophthalmic Formulation for the Treatment of Ophthalmic Inflammatory Diseases
Source: MDPI journal article supplement (doi:10.3390/pharmaceutics14010118), 2022-01-04
Supplement: s1 [file s1]

# Supplementary Materials: Physicochemical Stability of a Novel Tacrolimus Ophthalmic Formulation for the Treatment of Ophthalmic Inflammatory Diseases

Marion Barrieu, Philip Chennell, Mouloud Yessaad, Yassine Bouattour, Mathieu Wasiak, Mireille Jouannet, Yoann Le Basle and Valérie Sautou

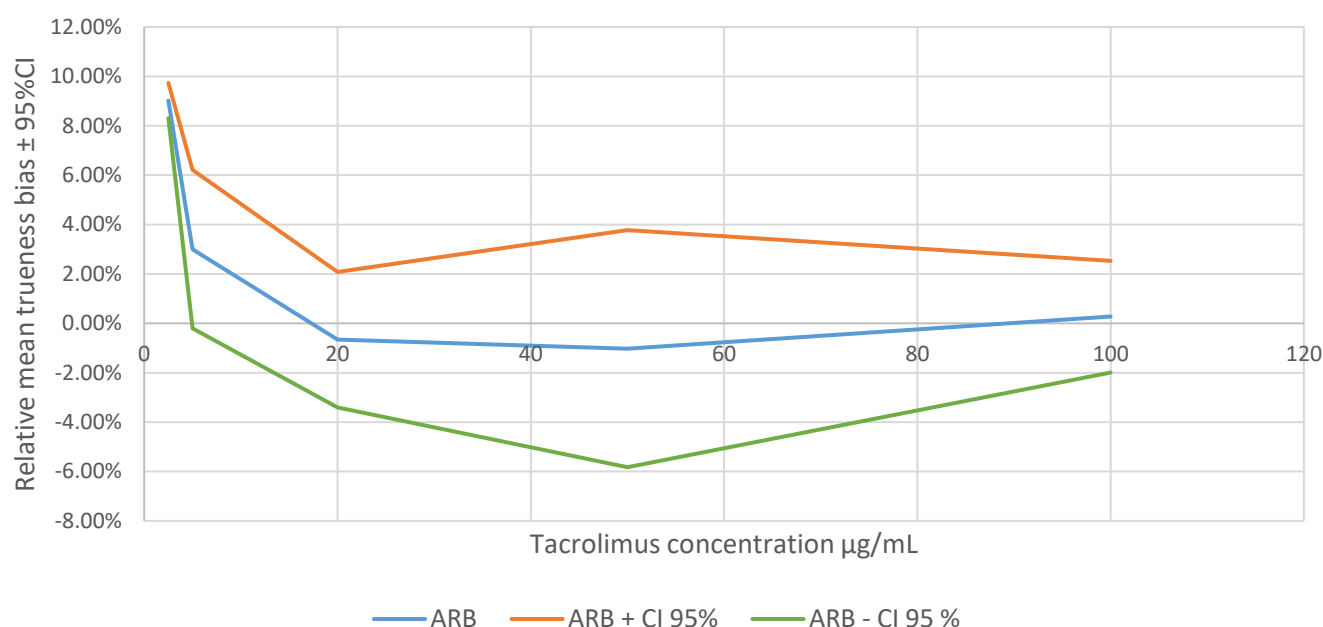

**Figure S1.** Accuracy profile of tacrolimus validation. ARB: Average relative trueness bias. CI: confidence interval.

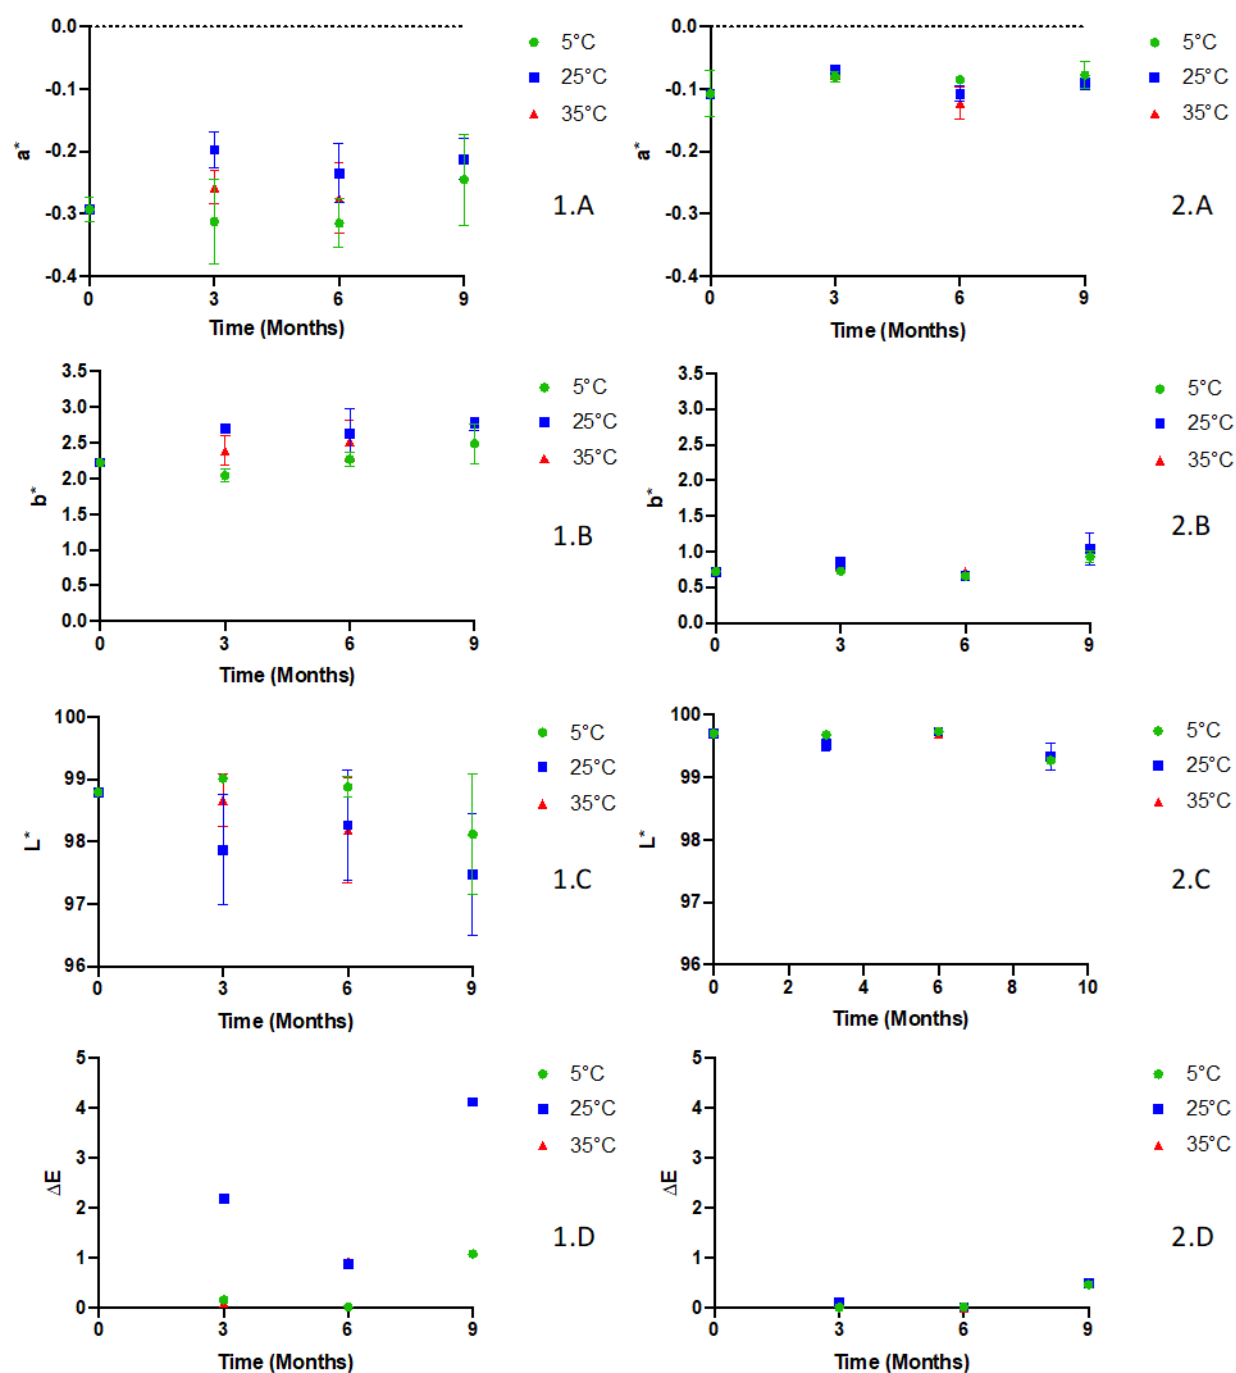

**Figure S2.** Evolution of chromaticity and luminance for the 1 mg/mL (1) and the 0.2 mg/mL formulation (2) with  $a^*$  (A),  $b^*$  (B),  $L^*$  (C) and  $\Delta E$  (D) during the 9 month stability study.

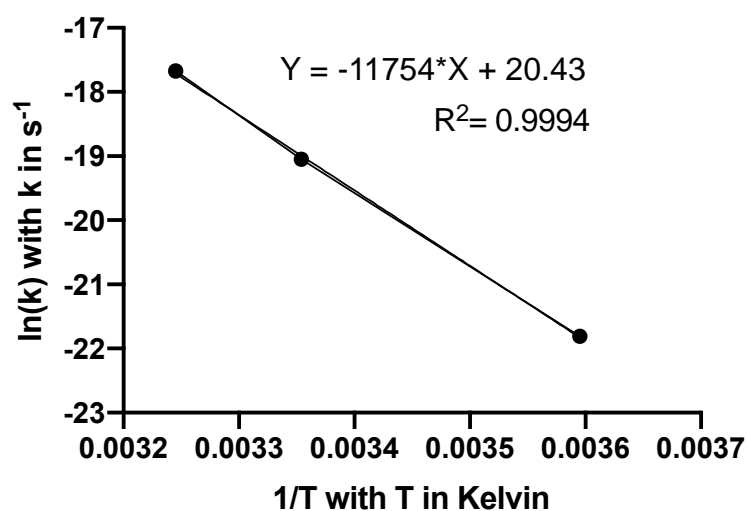

Figure S3. Applicability of the Arrhenius law.

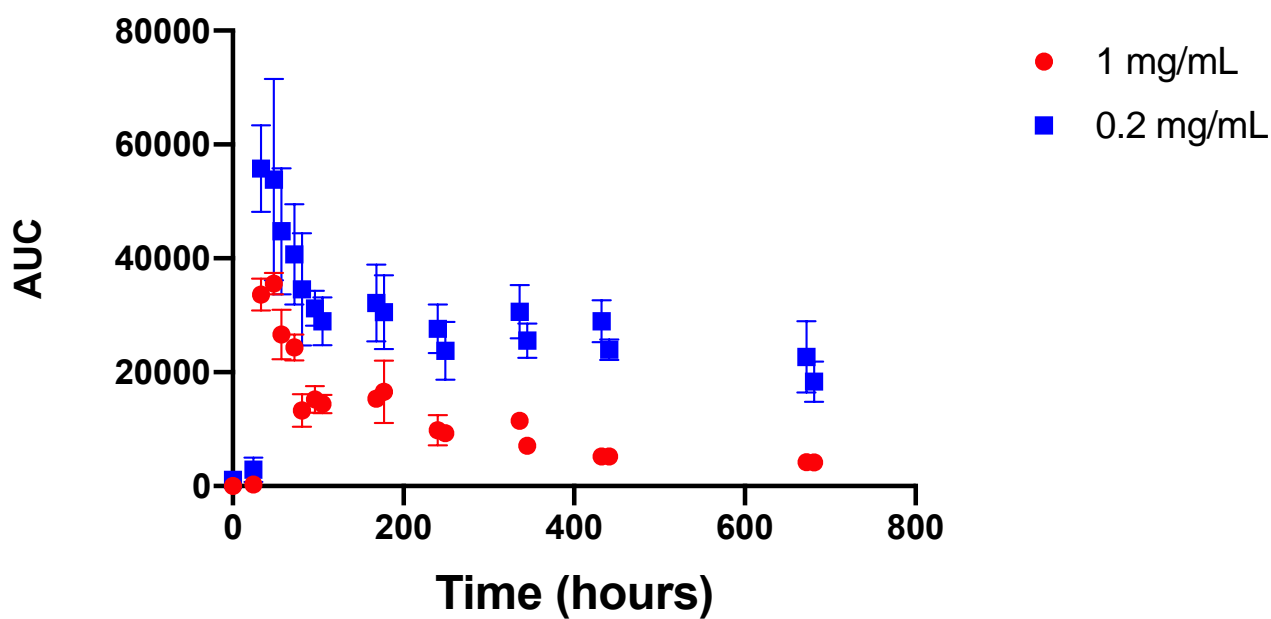

Figure S4. Evolution of the AUC of the leachable compound during the in-use assay at 5°C.

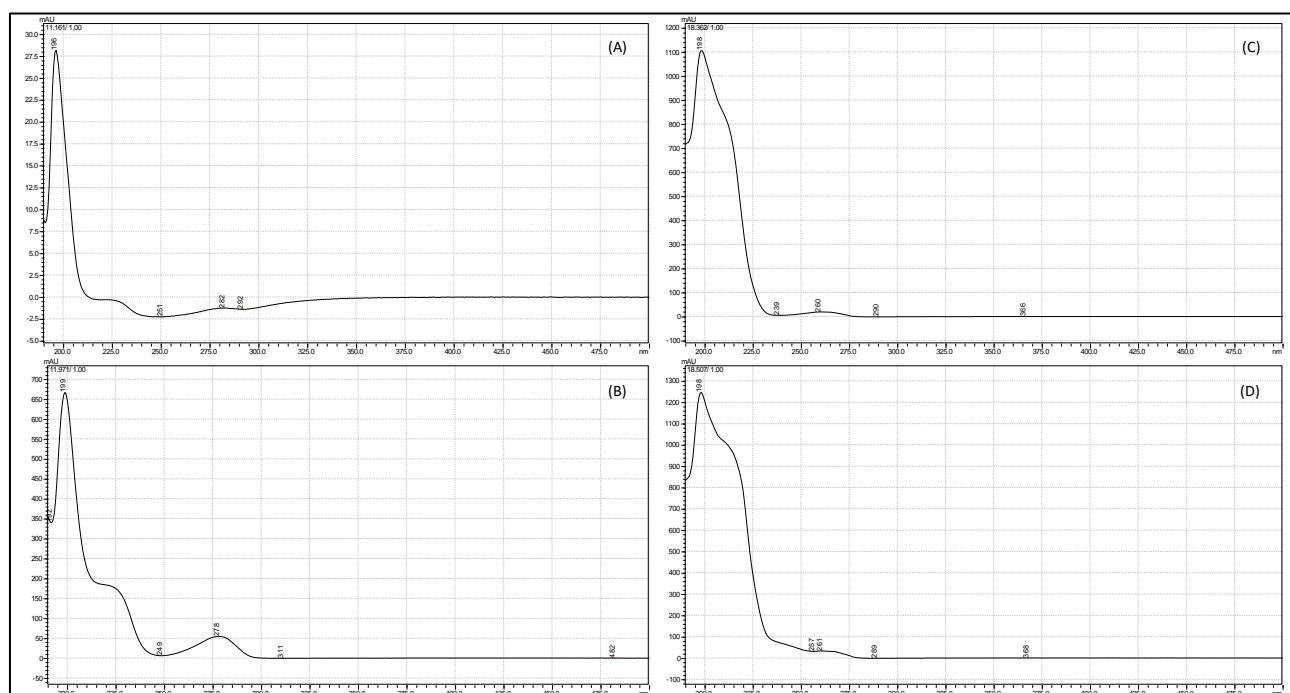

**Figure S5.** Comparison of the spectra UV of the leachable compound found in the in-use assay for the 1 mg/mL formulation after the delivery of the third drop (A) with the spectra UV of 2,4-Di-tert-butylphenol (B), 1,3-Di-tert-butylbenzene (C) and 1,4-Di-tert-butylbenzene (D).
